# Supplementary material for: MeCAT – comparing relative quantification of alpha lactalbumin using both molecular and elemental mass spectrometry
Source: Royal Society of Chemistry journal article supplement (doi:10.1039/c3an36602b), 2013-01-01
Supplement: c3an36602b.pdf [file c3an36602b.pdf]

## Supplementary material

**Table S1** Determined relative abundances and corresponding standard deviations of alpha lactalbumin in different mixtures by ESI-MS.

| Mix | protein ratios | label       | expected relative abundances | determined relative abundances by HPLC/ESI-MS | determined relative abundances by IRMPD |
|-----|----------------|-------------|------------------------------|-----------------------------------------------|-----------------------------------------|
| A   | 1              | Eu-MeCAT-IA | 47.8 %                       | 42.2 % ± 19.7 %                               | 34.7 % ± 4.5%                           |
|     | 1              | Tb-MeCAT-IA | 100.0 %                      | 93.8 % ± 8.1%                                 | 95.7% ± 7.2 %                           |
|     | 1              | Ho-MeCAT-IA | 100.0 %                      | 87.4 % ± 15.5 %                               | 87.7% ± 15.4 %                          |
|     | 1              | Tm-MeCAT-IA | 100.0 %                      | 83.0 % ± 15.9 %                               | 88.6% ± 11.7 %                          |
|     | 1              | Lu-MeCAT-IA | 97.4 %                       | 79.5 % ± 11.2 %                               | 51.6 % ± 10.2%                          |
| B   | 0.33           | Eu-MeCAT-IA | 15.9 %                       | 9.9 % ± 3.0 %                                 | 9.8 % ± 2.3 %                           |
|     | 0.66           | Tb-MeCAT-IA | 66.7 %                       | 48.8 % ± 6.2%                                 | 52.0 % ± 6.0 %                          |
|     | 1              | Ho-MeCAT-IA | 100.0 %                      | 100.0 % ± 0.0 %                               | 100 % ± 0.0 %                           |
|     | 0.66           | Tm-MeCAT-IA | 66.7 %                       | 61.0 % ± 4.2 %                                | 64.2 % ± 3.3 %                          |
|     | 0.33           | Lu-MeCAT-IA | 32.5 %                       | 28.1 % ± 4.0 %                                | 17.7 % ± 3.6 %                          |
| C   | 100            | Eu-MeCAT-IA | 49.1 %                       | 43.1 % ± 5.2 %                                | 46.2 % ± 9.6 %                          |
|     | 10             | Tb-MeCAT-IA | 10.3 %                       | 4.0 % ± 1.2 %                                 | 7.0 % ± 1.7 %                           |
|     | 1              | Ho-MeCAT-IA | 1.0 %                        | 1.6 % ± 1.8 %                                 | 2.0 % ± 2.6 %                           |
|     | 10             | Tm-MeCAT-IA | 10.3 %                       | 4.3 % ± 1.0 %                                 | 8.7 % ± 1.4 %                           |
|     | 100            | Lu-MeCAT-IA | 100.0%                       | 100.0% ± 0.0%                                 | 100 % ± 0.0 %                           |

**Table S2** Determined relative amounts and corresponding standard deviations of alpha lactalbumin in different mixtures using different strategies.

| Mix | protein ratios | label       | HPLC/ESI-MS      | IRMPD           | HPLC/ICP-MS     | ICP-MS         |
|-----|----------------|-------------|------------------|-----------------|-----------------|----------------|
| A   | 1              | Eu-MeCAT-IA | 0.81 (± 0.09)    | 0.73 (± 0.07)   | 0.87 (± 0.05)   | 0.85 (± 0.01)  |
|     | 1              | Tb-MeCAT-IA | 0.93 (± 0.06)    | 0.96 (± 0.07)   | 0.90 (± 0.08)   | 0.92 (± 0.01)  |
|     | 1              | Ho-MeCAT-IA | 1.00             | 1.00            | 1.00            | 1.00           |
|     | 1              | Tm-MeCAT-IA | 0.95 (± 0.03)    | 1.02 (± 0.07)   | 0.93 (± 0.01)   | 0.96 (± 0.00)  |
|     | 1              | Lu-MeCAT-IA | 0.92 (± 0.07)    | 0.59 (± 0.04)   | 0.95 (± 0.02)   | 0.99 (± 0.00)  |
| B   | 0.33           | Eu-MeCAT-IA | 0.16 (± 0.01)    | 0.21 (± 0.04)   | 0.28 (± 0.04)   | 0.27 (± 0.01)  |
|     | 0.66           | Tb-MeCAT-IA | 0.48 (± 0.07)    | 0.52 (± 0.05)   | 0.45 (± 0.05)   | 0.58 (± 0.00)  |
|     | 1              | Ho-MeCAT-IA | 1.00             | 1.00            | 1.00            | 1.00           |
|     | 0.66           | Tm-MeCAT-IA | 0.61 (± 0.02)    | 0.64 (± 0.01)   | 0.61 (± 0.04)   | 0.64 (± 0.00)  |
|     | 0.33           | Lu-MeCAT-IA | 0.28 (± 0.00)    | 0.18 (± 0.01)   | 0.32 (± 0.03)   | 0.33 (± 0.00)  |
| C   | 100            | Eu-MeCAT-IA | 113.88 (± 3.72)  | 78.20 (± 15.66) | 76.29 (± 13.62) | 69.40 (± 0.76) |
|     | 10             | Tb-MeCAT-IA | 5.44 (± 0.51)    | 5.54 (± 1.32)   | 5.02 (± 1.26)   | 4.75 (± 0.08)  |
|     | 1              | Ho-MeCAT-IA | 1.00             | 1.00            | 1.00            | 1.00           |
|     | 10             | Tm-MeCAT-IA | 6.13 (± 2.17)    | 7.02 (± 1.44)   | 5.30 (± 0.56)   | 5.51 (± 0.11)  |
|     | 100            | Lu-MeCAT-IA | 152.34 (± 57.70) | 83.09 (± 21.24) | 81.71 (± 12.51) | 79.50 (± 1.31) |
